# Supplementary material for: Imbalance of Endocannabinoid/Lysophosphatidylinositol Receptors Marks the Severity of Alzheimer’s Disease in a Preclinical Model: A Therapeutic Opportunity
Source: MDPI journal article supplement (doi:10.3390/biology9110377), 2020-11-05

# **Supplementary material**

**Table S1.** Primary antibodies used for Western blotting and IHC

| <b>Primary antibody</b>    | <b>Manufacturing details</b>        | <b>Dilution</b> |
|----------------------------|-------------------------------------|-----------------|
| <b>Iba1</b>                | Wako Chemicals(#019-19741)          | 1/500           |
| <b>MAGL</b>                | Cayman Chemical (#100035)           | 1/500           |
| <b>GPR55</b>               | Abcam (#ab41515-100)                | 1/500           |
| <b>CB2</b>                 | Abcam (#ab3561)                     | 1/200           |
| <b>NAPE-PLD</b>            | Abcam (#ab95397)                    | 1/1000          |
| <b>GFAP [G3893]</b>        | Sigma-Aldrich (#083M4785)           | 1/500           |
| <b>CB1</b>                 | Abcam (#ab23703)                    | 1/100           |
| <b>FAAH</b>                | Cayman Chemical (#101600)           | 1/100           |
| <b>DAGLβ</b>               | bioNova Científica (#orb182976)     | 1/100           |
| <b>COX-2 [D5H5]</b>        | Cell Signaling Technology (#12282)  | 1/200           |
| <b>α-Adaptin [ERP7572]</b> | Abcam (ab151720)                    | 1/2000          |
| <b>DAGLα</b>               | bioNova Científica (#orb156533)     | 1/100           |
| <b>iNOS</b>                | Thermo Fisher Scientific (#PA1-036) | 1/200           |
| <b>beta Amyloid (1-42)</b> | Thermo Fisher Scientific (#44-344)  | 1/200           |
| <b>beta Amyloid (1-40)</b> | Thermo Fisher Scientific (#44-136)  | 1/200           |
| <b>beta Amyloid</b>        | Abcam (#ab2539)                     | 1/200           |

Abbreviations: Iba1, Ionized calcium binding adaptor molecule 1; MAGL: Monoacylglycerol lipase; GPR55: G protein-coupled receptor 55; CB2: Cannabinoid receptor type 2; NAPE-PLD: N-acyl phosphatidylethanolamine-specific phospholipase D; GFAP, glial fibrillary acidic Protein; CB1: Cannabinoid receptor type 1; FAAH: Fatty acid amide hydrolase; DAGLβ: Diacylglycerol Lipase β; COX-2, Cyclooxygenase 2; DAGLα: Diacylglycerol Lipase α; iNOS: Inducible nitric oxide synthase.

**Figure S1:** GPR55 immunofluorescence on 5xFAD mice hippocampus with its negative control shown below.

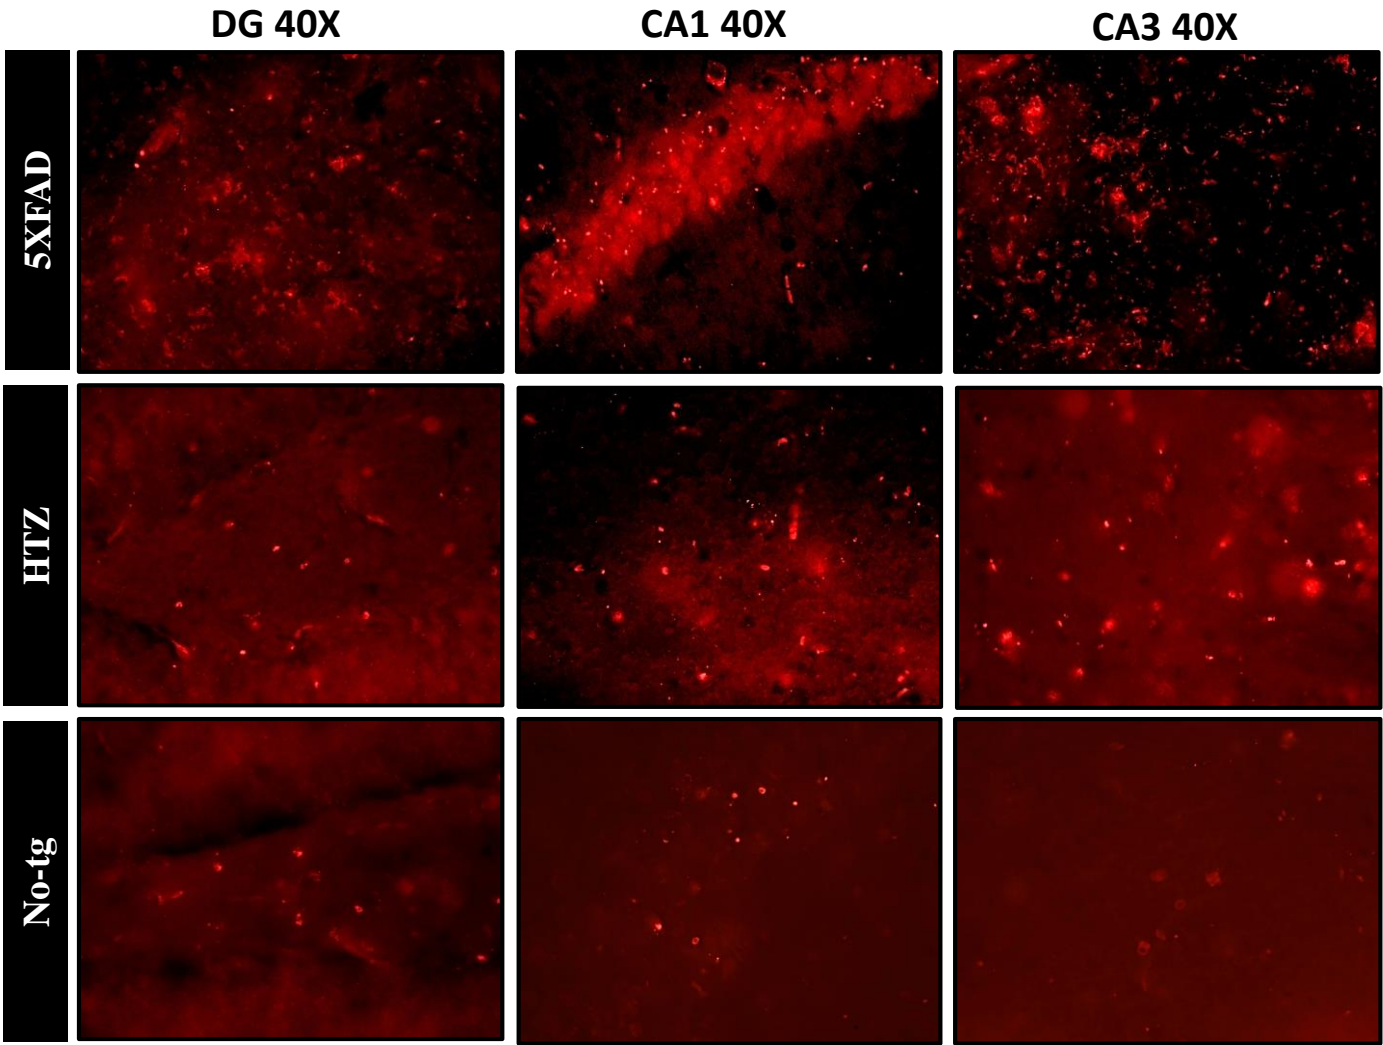

**5XFAD - CA1 10X GPR55-DAPI**

**CA1 40X GPR55-DAPI**

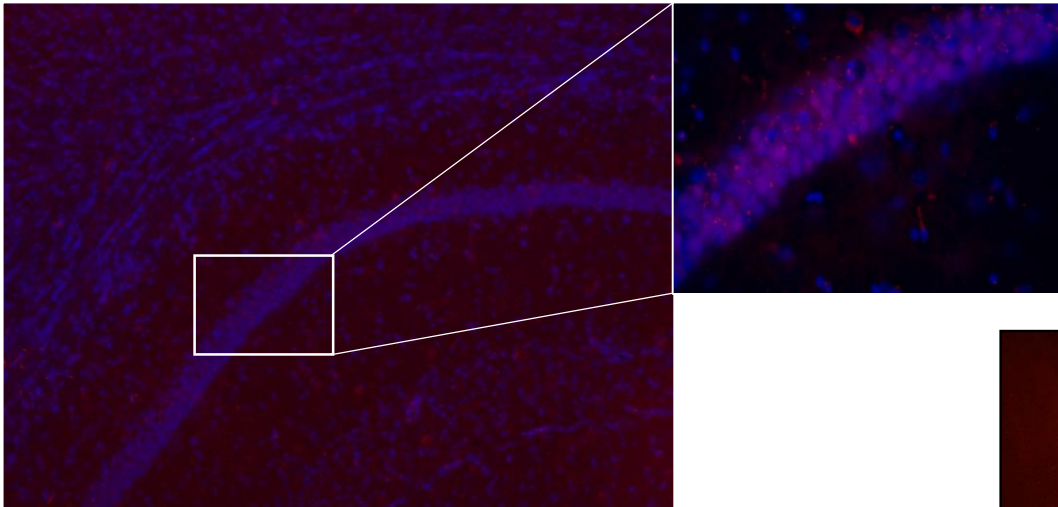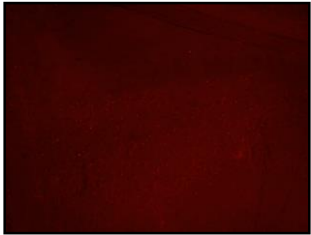

**Negative control**

**Figure S2 (unedited blots):** One whole membrane was used for DAGL $\alpha$ ,  $\alpha$ -Adaptin, CB1, FAAH, CB2 and MAGL immunoblottings on 5xFAD mice hippocampus (Figure 3&4)

**Whole membranes from Gel 1.** Individual membranes are shown below. **CB1** and **CB2** are represented in Figure 3a&b; **DAGL $\alpha$**  is represented in Figure 4a&d; **FAAH** and **MAGL** are represented in Figure 4b&d. All bands were quantified for histograms charts and statistical analysis. Proteins were normalized with  $\alpha$ -Adaptin.

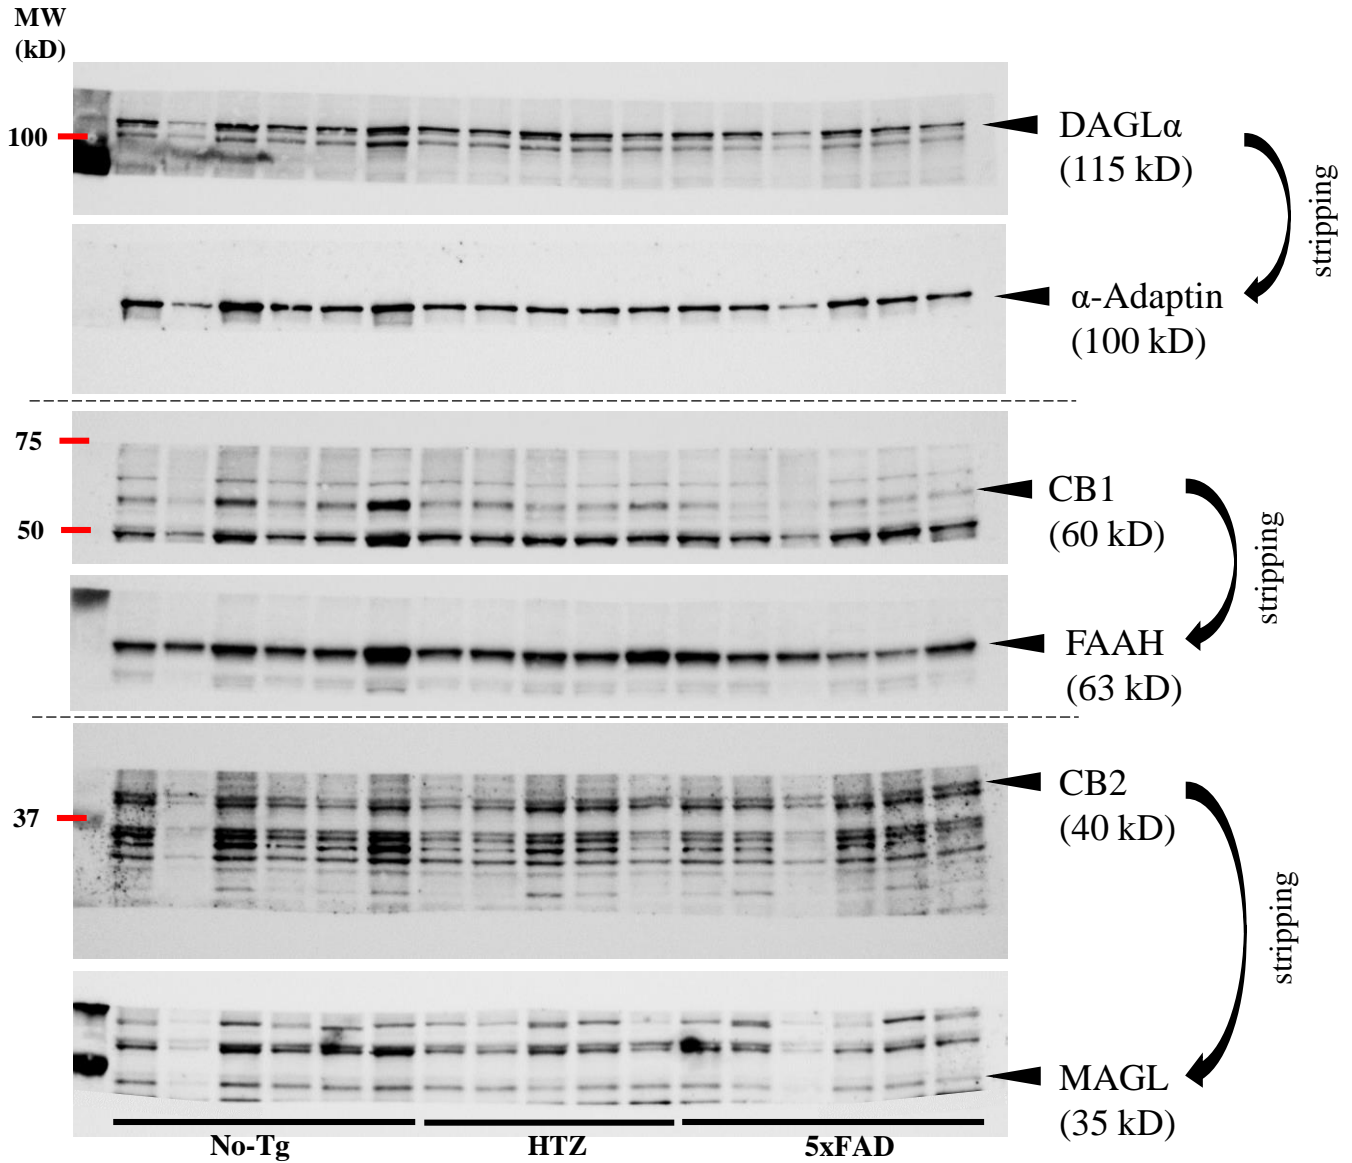

**Figure S3 (unedited blots) :** One whole membrane was used for COX-2,  $\alpha$ -Adaptin, GFAP and GPR55 immunoblottings on 5xFAD mice hippocampus (Figure 3&5)

**Whole membranes from Gel 2.** Red Ponceau Staining and individual membranes are shown below. **GPR55** is represented in Figure 3a&b; **GFAP** is represented in Figure 5a&b; **COX-2** is represented in Figure 5f&g. All bands were quantified for histograms charts and statistical analysis. Proteins were normalized with  $\alpha$ -Adaptin.

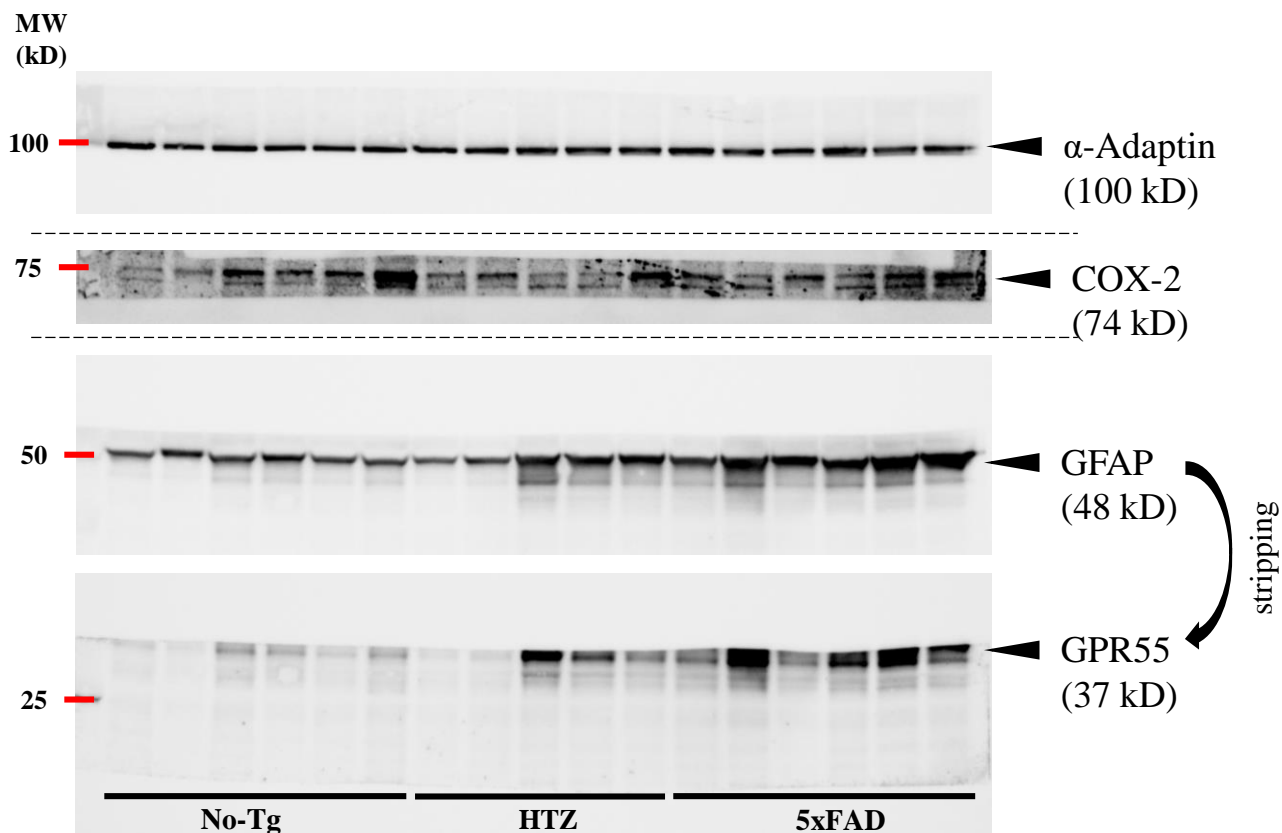

**Figure S4 (unedited blots) :** One whole membrane was used for iNOS,  $\alpha$ -Adaptin, and NAPE-PLD immunoblottings on 5xFAD mice hippocampus (Figure 4&5)

**Whole membranes from Gel 3.** Red Ponceau Staining and individual membranes are shown below. **NAPE-PLD** is represented in Figure 4a&d; **iNOS** is represented in Figure 5f&g. All bands were quantified for histograms charts and statistical analysis. Proteins were normalized with  $\alpha$ -Adaptin.

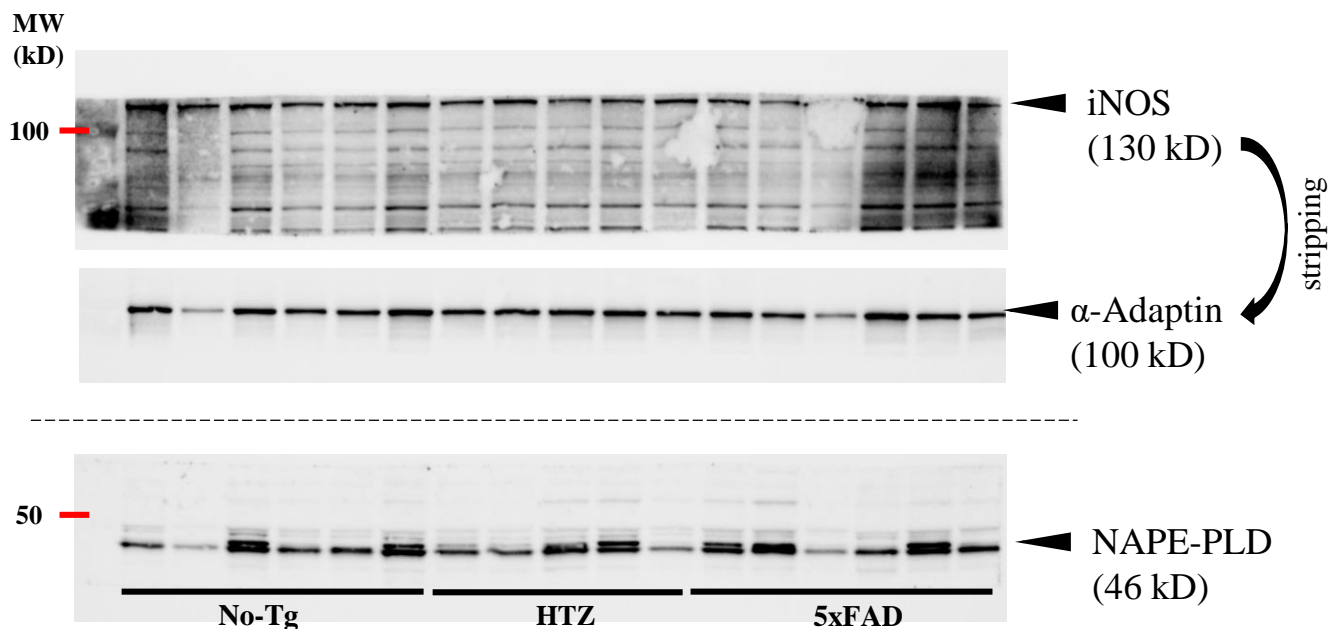

**Figure S5 (unedited blots) :** One whole membrane was used for Iba1 and  $\alpha$ -Adaptin immunoblotting on 5xFAD mice hippocampus (Figure 5)

**Whole membranes from Gel 4.** Red Ponceau Staining and individual membranes are shown below. **Iba1** is represented in Figure 5a&b. All bands were quantified for histograms charts and statistical analysis. Proteins were normalized with  $\alpha$ -Adaptin.

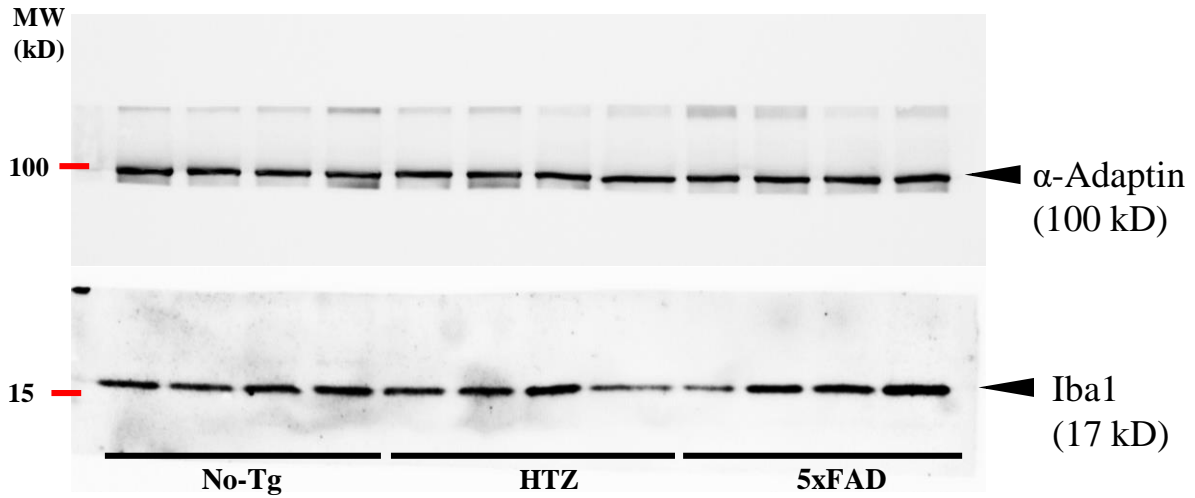

Supplement: s1 [file s1]
